# Supplementary material for: Whole-genome sequencing of a year-round fruiting jackfruit (Artocarpus heterophyllus Lam.) reveals high levels of single nucleotide variation
Source: Front Plant Sci. 2022 Dec 20;13:1044420. doi: 10.3389/fpls.2022.1044420 (PMC9809283; doi:10.3389/fpls.2022.1044420)
Supplement: Supplementary Table 1 — Comparison between the previously reported Artocarpus heterophyllus sequence and BARI Kanthal-3 sequence. [file Table_1.xlsx]

## Sheet: ST flowering_genes_orthogroups
Orthogroups	AGI	FLOR-ID Description	Arabidopsis thaliana	Artocapus altilis	A. heterophyllus	BARI_Kanthal-3	Ficus carica	Morus notabilis
OG0000017	AT3G57390	Time-course regulation of photoperiodic pathway	AT3G57390.1	Aa000018g0077.1, Aa000158g0122.1, Aa000711g0044.1, Aa000721g0007.1, Aa000721g0008.1, Aa000800g0035.1, Aa001060g0036.1, Aa001093g0052.1, Aa003100g0014.1, Aa003715g0020.1, Aa172134g0020.1	Ah002387g0001.1_1, Ah005305g0061.1_1, Ah006820g0070.1_1, Ah007822g0008.1_1, Ah007822g0009.1_1, Ah013758g0012.1_1, Ah073259g0008.1_1, Ah178249g0020.1_1, Ah179705g0019.1_1, Ah181115g0008.1_1	G007250.1, G007664.1, G013499.1, G014541.1, G015228.1, G017089.1, G019621.1, G021962.1, G026595.1, G033005.1, G037452.1, G043102.1, G044712.1, G054116.1, G058196.1, G062323.1, G062326.1, G063728.1, G064829.1, G064833.1, G065981.1, G066444.1, G067278.1, G067636.1	FCD_00002510-RA_cds, FCD_00004593-RA_cds, FCD_00004594-RA_cds, FCD_00004596-RA_cds, FCD_00006027-RA_cds, FCD_00006808-RA_cds, FCD_00008063-RA_cds, FCD_00009075-RA_cds, FCD_00013847-RA_cds, FCD_00014074-RA_cds, FCD_00016967-RA_cds, FCD_00018954-RA_cds, FCD_00018957-RA_cds, FCD_00022571-RA_cds, FCD_00022574-RA_cds, FCD_00022937-RA_cds, FCD_00025847-RA_cds, FCD_00026766-RA_cds, FCD_00030378-RA_cds, …	XP_024017626.1, XP_024017627.1, XP_024020325.1, XP_024020326.1, XP_024028270.1, XP_024028271.1, XP_024028272.1
OG0000222	AT3G47500	Photoperiod pathway	AT3G47500.1, AT5G39660.1, AT5G62430.1	Aa000334g0132.1, Aa000972g0225.1, Aa001462g0042.1, Aa002014g0063.1, Aa002023g0074.1	Ah001138g0009.1_1, Ah001538g0053.1_1, Ah003474g0016.1_1, Ah004429g0015.1_1, Ah005236g0049.1_1, Ah179840g0020.1_1	G004691.1, G009180.1, G015889.1, G049104.1, G053991.1, G057578.1	FCD_00001440-RA_cds, FCD_00014736-RA_cds, FCD_00014877-RA_cds, FCD_00036597-RA_cds	XP_010088142.1, XP_010089911.1, XP_010108679.1
OG0000240	AT1G52740	General processes & autonomous pathway	AT1G52740.1, AT2G38810.1, AT3G54560.1	Aa000180g0145.1, Aa000504g0117.1, Aa001020g0004.1, Aa001858g0274.1, Aa004201g0004.1	Ah000498g0003.1_1, Ah006203g0001.1_1, Ah009883g0012.1_1, Ah022929g0044.1_1, Ah081283g0045.1_1	G042358.1, G043175.1, G056485.1, G061019.1, G065687.1, G069009.1	FCD_00000624-RA_cds, FCD_00007741-RA_cds, FCD_00020244-RA_cds	XP_010087116.1, XP_010102813.1, XP_024018620.1, XP_024023065.1
OG0000323	AT1G69120	Overview	AT1G26310.1, AT1G69120.1, AT3G30260.1, AT5G60910.1	Aa000972g0131.1, Aa000990g0003.1, Aa002097g0057.1	Ah002669g0009.1_1, Ah178475g0034.1_1	G015062.1, G017356.1, G028308.1, G044710.1, G062920.1	FCD_00008064-RA_cds, FCD_00026765-RA_cds	XP_024018303.1, XP_024018304.1, XP_024023273.1, XP_024023274.1, XP_024024830.1, XP_024024831.1, XP_024024832.1
OG0000418	AT1G50700	Photoperiod pathway	AT1G50700.1, AT3G20410.1, AT4G04710.1, AT4G04720.1, AT4G21940.1	Aa000092g0203.1, Aa000944g0024.1, Aa001621g0012.1, Aa003458g0046.1	Ah000279g0017.1_1, Ah180265g0045.1_1, Ah180536g0009.1_1, Ah180749g0025.1_1	G023994.1, G029784.1, G033431.1, G045469.1	FCD_00003095-RA_cds, FCD_00016589-RA_cds	XP_010092160.1, XP_010093289.1
OG0000448	AT3G44110	General processes & autonomous pathway	AT3G44110.1, AT5G22060.1	Aa000010g0021.1, Aa000414g0014.1, Aa001046g0007.1, Aa002093g0007.1	Ah001907g0001.1_1, Ah003989g0007.1_1, Ah005925g0028.1_1, Ah179909g0014.1_1	G016822.1, G038934.1, G052190.1, G060281.1	FCD_00012022-RA_cds, FCD_00022205-RA_cds, FCD_00022295-RA_cds	XP_010089281.1, XP_010090486.1, XP_024017024.1, XP_024032575.1
OG0000488	AT3G28910	General processes & autonomous pathway	AT1G74650.1, AT3G28910.1, AT3G47600.1, AT5G62470.1	Aa000018g0037.1, Aa000334g0147.1, Aa001462g0027.1, Aa002014g0032.1	Ah000084g0011.1_1, Ah177496g0007.1_1, Ah178191g0001.1_1, Ah180198g0028.1_1	G013206.1, G014348.1, G023158.1, G066427.1	FCD_00001462-RA_cds, FCD_00018182-RA_cds	XP_010091514.1, XP_010105629.1
OG0000507	AT2G22630	Photoperiod pathway	AT2G14210.1, AT2G22630.1, AT3G57230.1, AT4G37940.1	Aa001645g0041.1	Ah002608g0044.1_1, Ah005305g0062.1_1, Ah180573g0018.1_1, Ah181115g0009.1_1	G011327.1, G030508.1, G037453.1, G039234.1, G058247.1, G058248.1	FCD_00030801-RA_cds	XP_024026631.1, XP_024026632.1, XP_024026633.1, XP_024031735.1
OG0000563	AT3G02885	Hormone pathway	AT1G74670.1, AT2G30810.1, AT3G02885.1, AT3G10185.1	Aa000182g0001.1, Aa002487g0008.1	Ah018890g0028.1_1, Ah177791g0007.1_1, Ah180382g0012.1_1	G026475.1, G027721.1, G038673.1	FCD_00010411-RA_cds, FCD_00018577-RA_cds, FCD_00028200-RA_cds	XP_010108998.1, XP_024018550.1, XP_024025445.1, XP_024028869.1
OG0000682	AT1G15750	Aging pathway	AT1G15750.1, AT1G80490.1, AT3G15880.1	Aa000092g0161.1, Aa000944g0067.1, Aa004969g0017.1	Ah180459g0001.1_1, Ah180849g0028.1_1, Ah181088g0013.1_1	G028411.1, G034546.1	FCD_00003160-RA_cds, FCD_00032617-RA_cds	XP_010097168.1, XP_010103710.1, XP_024021872.1, XP_024021873.1, XP_024026087.1
OG0000684	AT1G66650	Photoperiod pathway	AT1G66610.1, AT1G66620.1, AT1G66630.1, AT1G66650.1, AT1G66660.1, AT5G37870.1, AT5G37890.1, AT5G37900.1, AT5G37910.1, AT5G37930.1, AT5G62800.1		Ah180338g0010.1_1	G025620.1	FCD_00016443-RA_cds	XP_010108933.1, XP_010113237.1, XP_024024171.1, XP_024029622.1
OG0000699	AT2G19520	Temperature pathway	AT2G19520.1	Aa000074g0192.1, Aa000277g0060.1, Aa000888g0323.1, Aa001850g0013.1	Ah000153g0013.1_1, Ah180053g0012.1_1, Ah180662g0007.1_1, Ah180752g0012.1_1	G009248.1, G020202.1, G031935.1, G033462.1	FCD_00005521-RA_cds, FCD_00008164-RA_cds	XP_010106236.1, XP_024017138.1, XP_024027902.1
OG0000719	AT3G11910	General processes & autonomous pathway	AT3G11910.1, AT5G06600.1	Aa000178g0001.1, Aa000455g0006.1, Aa001346g0025.1	Ah001840g0008.1_1, Ah007329g0009.1_1, Ah008016g0035.1_1, Ah180272g0008.1_1	G024203.1, G037849.1, G063821.1, G065425.1	FCD_00029388-RA_cds, FCD_00034501-RA_cds, FCD_00036925-RA_cds	XP_024026270.1, XP_024027015.1
OG0000738	AT5G42400	Time-course regulation of photoperiodic pathway	AT5G42400.1	Aa002494g0004.1, Aa002494g0005.1, Aa003223g0001.1, Aa172115g0009.1	Ah180019g0001.1_1	G018803.1, G018804.1, G018805.1, G052451.1, G052452.1	FCD_00026410-RA_cds	XP_024031218.1, XP_024031219.1, XP_024031220.1, XP_024031221.1, XP_024031222.1, XP_024031223.1
OG0000775	AT1G26830	Vernalization	AT1G26830.1, AT1G69670.1	Aa000972g0251.1, Aa000972g0252.1, Aa001906g0039.1, Aa001906g0040.1	Ah005236g0021.1_1, Ah180007g0012.1_1, Ah180007g0013.1_1	G018578.1, G018579.1, G057540.1, G057541.1	FCD_00014701-RA_cds, FCD_00014702-RA_cds	XP_010091210.1, XP_010091211.1
OG0000796	AT1G14400	FLC regulation through protein complexes	AT1G14400.1, AT2G02760.1, AT5G62540.1	Aa000356g0006.1, Aa000371g0005.1	Ah006026g0071.1_1, Ah179830g0006.1_1, Ah179999g0025.1_1, Ah181048g0011.1_1	G015698.1, G018031.1, G036688.1, G060681.1	FCD_00014663-RA_cds, FCD_00018236-RA_cds	XP_010086564.1, XP_010096353.1
OG0000823	AT4G29130	Aging pathway	AT2G19860.1, AT4G29130.1	Aa000074g0126.1, Aa000217g0027.1, Aa000558g0001.1, Aa000888g0275.1	Ah000153g0058.1_1, Ah001301g0002.1_1, Ah002079g0008.1_1, Ah007806g0002.1_1	G006602.1, G009311.1, G040611.1, G064776.1	FCD_00005625-RA_cds, FCD_00008280-RA_cds	XP_010098150.1
OG0000840	AT2G38880	Hormone pathway	AT2G38880.1, AT4G14540.1, AT5G47640.1	Aa000783g0046.1, Aa001252g0031.1	Ah001393g0027.1_1, Ah006287g0029.1_1, Ah180555g0001.1_1, Ah180664g0020.1_1	G007884.1, G030179.1, G032029.1, G061286.1	FCD_00005851-RA_cds, FCD_00014176-RA_cds	XP_010087661.1, XP_010104073.1
OG0000861	AT4G24680	General processes & autonomous pathway	AT4G24680.1	Aa000279g0007.1, Aa000279g0008.1, Aa002005g0042.1	Ah003223g0014.1_1, Ah004526g0003.1_1, Ah180583g0016.1_1	G024121.1, G024122.1, G024123.1, G030815.1, G047752.1, G054267.1	FCD_00018051-RA_cds	XP_024025321.1, XP_024025322.1, XP_024025324.1
OG0000922	AT5G06170	Sugar pathway	AT1G22710.1, AT1G66570.1, AT1G71880.1, AT1G71890.1, AT2G14670.1, AT5G06170.1, AT5G43610.1	Aa000836g0016.1, Aa001620g0028.1	Ah000974g0010.1_1, Ah180441g0009.1_1	G028044.1, G028045.1, G068692.1	FCD_00027854-RA_cds	XP_024020344.1
OG0000973	AT2G45660	Overview	AT2G45660.1, AT4G22950.1, AT5G51860.1, AT5G51870.1, AT5G62165.1	Aa002076g0032.1, Aa003100g0013.1	Ah004490g0003.1_1	G043103.1, G054117.1	FCD_00022936-RA_cds, FCD_00037873-RA_cds	XP_024028225.1, XP_024028226.1, XP_024028227.1, XP_024028228.1
OG0001017	AT5G02810	Circadian clock overview	AT5G02810.1, AT5G60100.1	Aa172058g0066.1	Ah006883g0025.1_1	G026014.1, G046661.2, G046662.1, G062445.1	FCD_00005162-RA_cds, FCD_00005163-RA_cds, FCD_00035570-RA_cds	XP_024024235.1, XP_024024236.1, XP_024024237.1, XP_024024238.1, XP_024024239.1
OG0001119	AT2G13540	microRNA biosynthesis	AT2G13540.1	Aa000054g0011.1, Aa000568g0007.1	Ah003482g0006.1_1, Ah177791g0009.1_1, Ah180348g0015.1_1	G013552.1, G040471.1, G049183.1, G052637.1, G061648.1	FCD_00019162-RA_cds	XP_010093715.2, XP_010105405.2, XP_024021053.1
OG0001176	AT5G64960	Vernalization	AT5G10270.1, AT5G64960.1	Aa000545g0055.1, Aa004455g0013.1	Ah000939g0021.1_1, Ah021704g0019.1_1, Ah177659g0002.1_1	G013465.1, G041107.1, G051443.1, G068069.1	FCD_00012911-RA_cds, FCD_00026891-RA_cds	XP_024021772.1, XP_024026224.1
OG0001434	AT5G44200	microRNA biosynthesis	AT5G44200.1	Aa000768g0020.1	Ah001393g0025.1_1	G007877.1, G060066.1	FCD_00019949-RA_cds	XP_024032075.1, XP_024032076.1, XP_024032077.1, XP_024032081.1, XP_024032082.1, XP_024032083.1, XP_024032084.1, XP_024032085.1
OG0001531	AT1G57820	General processes & autonomous pathway	AT1G57800.1, AT1G57820.1, AT1G66040.1, AT1G66050.1, AT5G39550.1	Aa000191g0050.1, Aa003015g0066.1	Ah004630g0024.1_1, Ah179848g0006.1_1	G016011.1, G054904.1	FCD_00013946-RA_cds	XP_024023698.1
OG0001541	AT1G32230	General processes & autonomous pathway	AT1G32230.1, AT2G35510.1	Aa000343g0056.1, Aa001786g0021.1	Ah036677g0006.1_1, Ah180046g0017.1_1	G019810.1, G050137.1	FCD_00025667-RA_cds	XP_010096927.1, XP_024021727.1, XP_024021728.1, XP_024021729.1
OG0001597	AT1G01060	Circadian clock overview	AT1G01060.1	Aa000277g0228.1, Aa001852g0023.1	Ah180378g0003.1_1, Ah180649g0026.1_1	G026387.1, G031713.1, G031714.1	FCD_00012137-RA_cds, FCD_00035351-RA_cds	XP_024028464.1, XP_024028465.1, XP_024028466.1
OG0001599	AT2G34880	General processes & autonomous pathway	AT1G30810.1, AT2G34880.1, AT4G20400.1	Aa000364g0038.1, Aa003175g0006.1	Ah006820g0014.1_1	G042403.1, G062229.1	FCD_00028904-RA_cds, FCD_00036677-RA_cds	XP_024022754.1, XP_024022755.1, XP_024022756.1
OG0001622	AT1G04400	Photoperiod pathway	AT1G04400.1	Aa003656g0007.1	Ah003877g0031.1_1, Ah180015g0021.1_1	G018751.1, G051351.1	FCD_00021662-RA_cds	XP_024026780.1, XP_024026781.1, XP_024026782.1, XP_024026783.1, XP_024026785.1, XP_024026786.1
OG0001637	AT2G18880	FLC regulation through protein complexes	AT2G18870.1, AT2G18880.1, AT4G30200.1	Aa000499g0044.1, Aa000637g0019.1	Ah002691g0001.1_1, Ah008674g0001.1_1	G045064.1, G066883.1	FCD_00023598-RA_cds, FCD_00024966-RA_cds	XP_024019905.1, XP_024019906.1
OG0001679	AT3G43190	Sugar pathway	AT3G43190.1, AT5G20830.1	Aa000277g0192.1, Aa001852g0056.1	Ah014791g0029.1_1, Ah180371g0031.1_1	G008572.1, G026219.1	FCD_00010573-RA_cds	XP_010107074.1, XP_024028482.1, XP_024028483.1, XP_024028484.1
OG0001808	AT5G20320	General processes & autonomous pathway	AT5G20320.1	Aa002301g0008.1	Ah180042g0013.1_1, Ah180126g0018.1_1	G019708.1, G021778.1	FCD_00017788-RA_cds, FCD_00017789-RA_cds, FCD_00017792-RA_cds, FCD_00023491-RA_cds	XP_024022600.1, XP_024022601.1, XP_024022602.1
OG0001878	AT1G28520	Photoperiod pathway	AT1G28520.1	Aa000258g0117.1, Aa000890g0204.1	Ah000840g0013.1_1, Ah005222g0038.1_1	G057413.1, G066253.1	FCD_00028402-RA_cds	XP_010111154.1, XP_024031048.1, XP_024031049.1, XP_024031050.1
OG0001890	AT1G25560	Hormone pathway	AT1G13260.1, AT1G25560.1, AT1G68840.1, AT3G25730.1	Aa000972g0040.1, Aa001187g0124.1	Ah003392g0009.1_1, Ah178147g0024.1_1	G014070.1, G048662.1	FCD_00011347-RA_cds	XP_010093403.1
OG0001895	AT3G18990	FLC regulation through protein complexes	AT1G49480.1, AT3G18990.1	Aa000426g0202.1, Aa001309g0075.1	Ah001597g0020.1_1, Ah180360g0004.1_1	G010144.1, G025996.1	FCD_00014416-RA_cds	XP_024021268.1, XP_024021269.1, XP_024021270.1
OG0001916	AT1G53090	Photoperiod pathway	AT1G53090.1, AT3G15354.1	Aa000531g0010.1, Aa003809g0002.1	Ah001856g0027.1_1, Ah180995g0008.1_1	G036063.1, G038100.1	FCD_00034051-RA_cds	XP_024032184.1, XP_024032185.1, XP_024032186.1
OG0001992	AT1G30970	FLC regulation through protein complexes	AT1G30970.1	Aa000160g0020.1, Aa171988g0050.1	Ah004534g0035.1_1, Ah180782g0003.1_1	G033702.1, G054334.1	FCD_00026688-RA_cds	XP_024020147.1, XP_024020148.1, XP_024020149.1, XP_024020150.1
OG0001994	AT1G18450	FLC regulation through protein complexes	AT1G18450.1	Aa000269g0066.1, Aa001978g0181.1	Ah001365g0059.1_1, Ah015039g0037.1_1	G007464.1, G008710.1	FCD_00012437-RA_cds, FCD_00029368-RA_cds	XP_024020240.1, XP_024020241.1, XP_024020242.1
OG0002008	AT2G34720	Hormone pathway	AT1G30500.1, AT2G34720.1	Aa000499g0041.1, Aa007149g0011.1	Ah004239g0002.1_1, Ah009194g0001.1_1	G053302.1, G067737.1	FCD_00021178-RA_cds	XP_024022777.1, XP_024022778.1, XP_024022779.1
OG0002048	AT1G76710	General processes & autonomous pathway	AT1G76710.1	Aa000310g0007.1, Aa005433g0020.1	Ah006287g0017.1_1, Ah006287g0019.1_1	G061252.1, G061261.1	FCD_00033125-RA_cds	XP_024023785.1, XP_024023786.1, XP_024023787.1, XP_024023788.1
OG0002066	AT1G08970	Hormone pathway	AT1G08970.1, AT1G54830.1	Aa000888g0144.1, Aa172095g0020.1	Ah000742g0003.1_1, Ah180049g0079.1_1	G019955.1, G063946.1	FCD_00018832-RA_cds, FCD_00032997-RA_cds	XP_010094005.1, XP_024019806.1
OG0002072	AT1G06040	Photoperiod pathway	AT1G06040.1, AT2G31380.1	Aa001233g0058.1, Aa001653g0014.1	Ah001549g0007.1_1, Ah180005g0044.1_1	G009488.1, G018505.1	FCD_00030996-RA_cds, FCD_00037555-RA_cds	XP_010101614.1, XP_024024815.1
OG0002078	AT4G38680	General processes & autonomous pathway	AT2G21060.1, AT4G38680.1	Aa000509g0138.1, Aa001858g0138.1	Ah000032g0068.1_1, Ah003763g0027.1_1	G048196.1, G049668.1, G050751.1	FCD_00000805-RA_cds, FCD_00019758-RA_cds	XP_010090314.1
OG0002118	AT2G17290	Photoperiod pathway	AT2G17290.1, AT4G35310.1, AT4G38230.1	Aa001978g0138.1, Aa003694g0039.1	Ah000815g0029.1_1, Ah022601g0011.1_1	G042132.1, G065912.1	FCD_00000091-RA_cds	XP_010090706.1, XP_024017668.1
OG0002145	AT2G17770	Temperature pathway	AT2G17770.1, AT4G35900.1	Aa000807g0063.1, Aa000986g0019.1	Ah001858g0012.1_1	G033627.1, G038194.1, G059073.1	FCD_00030925-RA_cds, FCD_00030927-RA_cds	XP_024032874.1, XP_024032875.1
OG0002154	AT2G30140	General processes & autonomous pathway	AT2G30140.1, AT2G30150.1	Aa000467g0028.1	Ah000840g0038.1_1, Ah001535g0003.1_1	G009080.1, G014879.1, G066286.1	FCD_00001944-RA_cds, FCD_00001945-RA_cds, FCD_00001948-RA_cds	XP_010099459.1
OG0002159	AT2G25930	Temperature pathway	AT2G25930.1	Aa000002g0230.1, Aa000209g0087.1	Ah178306g0001.1_1	G013616.1, G013617.1, G014741.1, G014742.1	FCD_00003678-RA_cds, FCD_00003679-RA_cds	XP_010097101.1, XP_024021826.1
OG0002188	AT2G22540	Overview	AT2G22540.1, AT4G24540.1	Aa005747g0048.1, Aa172134g0040.1	Ah100350g0009.1_1, Ah180200g0015.1_1	G002664.1, G023217.1	FCD_00016968-RA_cds	XP_024028572.1, XP_024028573.1, XP_024028574.1
OG0002194	AT2G46790	Circadian clock overview	AT2G46670.1, AT2G46790.1	Aa000277g0236.1, Aa001852g0017.1	Ah001138g0026.1_1, Ah005727g0032.1_1	G004707.1, G059728.1, G059729.1	FCD_00029536-RA_cds	XP_010107144.1, XP_024028461.1
OG0002263	AT3G22380	Circadian clock overview	AT3G22380.1, AT3G63180.1	Aa000888g0118.1, Aa172095g0045.1	Ah000465g0014.1_1, Ah180049g0105.1_1	G019996.1, G055184.1	FCD_00009357-RA_cds	XP_010108008.2, XP_024029022.1, XP_024029023.1
OG0002283	AT3G05120	Hormone pathway	AT3G05120.1, AT5G27320.1	Aa000189g0416.1, Aa000219g0180.1	Ah002945g0016.1_1, Ah179985g0074.1_1	G017661.1, G046180.1	FCD_00001129-RA_cds	XP_010102678.1, XP_024025410.1, XP_024025412.1
OG0002300	AT3G22590	FLC regulation through protein complexes	AT3G22590.1	Aa000014g0027.1, Aa000888g0076.1	Ah000082g0032.1_1, Ah000465g0050.1_1	G001778.1, G031260.1, G055257.1, G066129.1	FCD_00009288-RA_cds	XP_010096158.1, XP_024021227.1
OG0002529	AT1G14920	Hormone pathway	AT1G14920.1, AT2G01570.1	Aa000347g0009.1, Aa000629g0007.1	Ah000156g0016.1_1, Ah178276g0001.1_1	G009740.1, G014621.1	FCD_00015636-RA_cds, FCD_00018730-RA_cds	XP_010101954.2
OG0002546	AT1G31814	FLC regulation through protein complexes	AT1G31814.1, AT5G16320.1	Aa001220g0025.1, Aa013275g0014.1	Ah005271g0003.1_1, Ah020182g0022.1_1	G039795.1, G039796.1, G057916.1	FCD_00020159-RA_cds	XP_010097278.1
OG0002726	AT1G10570	General processes & autonomous pathway	AT1G10570.1, AT1G60220.1	Aa000614g0088.1, Aa000972g0379.1	Ah000273g0005.1_1, Ah004952g0003.1_1	G045254.1, G056270.1	FCD_00002867-RA_cds	XP_024023957.1, XP_024023958.1
OG0002816	AT1G25540	Photoperiod pathway	AT1G25540.1	Aa000972g0033.1	Ah000560g0044.1_1, Ah003392g0003.1_1	G048651.2, G059429.1	FCD_00011329-RA_cds, FCD_00011332-RA_cds	XP_024016986.1, XP_024027584.1, XP_024029332.1
OG0002832	AT1G10120		AT1G10120.1	Aa000002g0250.1, Aa000209g0071.1	Ah177241g0002.1_1, Ah180598g0006.1_1	G012922.1, G031007.1	FCD_00003645-RA_cds	XP_010109419.2, XP_024029922.1, XP_024029923.1
OG0002849	AT2G34140		AT1G29160.1, AT2G34140.1	Aa001423g0009.1, Aa003615g0032.1	Ah000864g0028.1_1, Ah003356g0042.1_1	G048548.1, G066775.1	FCD_00007216-RA_cds	XP_010103030.2, XP_024025645.1
OG0002859	AT1G35460	Photoperiod pathway	AT1G35460.1, AT4G09180.1	Aa001618g0045.1, Aa002134g0008.1	Ah180612g0030.1_1	G031315.1, G035406.1	FCD_00020502-RA_cds	XP_024021064.1, XP_024021065.1, XP_024021066.1
OG0002890	AT1G05830	Time-course regulation of photoperiodic pathway	AT1G05830.1, AT2G31650.1	Aa000529g0051.1, Aa002646g0004.1	Ah002619g0016.1_1, Ah009141g0005.1_1	G044478.1, G067563.1	FCD_00017761-RA_cds	XP_024026210.1, XP_024026211.1
OG0002905	AT1G53160	Overview	AT1G53160.1, AT2G33810.1, AT3G15270.1	Aa000371g0090.1, Aa005801g0039.1	Ah002409g0001.1_1, Ah178372g0001.1_1	G014883.1, G043268.1	FCD_00012174-RA_cds	XP_010106183.1
OG0002931	AT2G37630	Hormone pathway	AT2G37630.1	Aa000300g0029.1, Aa002542g0073.1	Ah009022g0006.1_1, Ah180809g0002.1_1	G034129.1, G067517.1	FCD_00024474-RA_cds, FCD_00036767-RA_cds	XP_010097844.1, XP_024022302.1
OG0002967	AT2G46260	Vernalization	AT2G46260.1, AT3G61600.1	Aa000180g0226.1, Aa000676g0016.1	Ah180697g0008.1_1, Ah180851g0028.1_1	G032544.1, G034608.1	FCD_00013539-RA_cds	XP_010092900.1, XP_024019070.1
OG0002999	AT2G18915	Circadian clock overview	AT2G18915.1, AT5G57360.1	Aa000532g0009.1, Aa000938g0010.1	Ah005912g0003.1_1, Ah178130g0002.1_1	G014019.1, G060165.1	FCD_00023573-RA_cds, FCD_00024946-RA_cds	XP_010094209.1
OG0003054	AT2G20570	General processes & autonomous pathway	AT2G20570.1	Aa000158g0240.1, Aa172073g0008.1	Ah001196g0003.1_1, Ah180426g0016.1_1	G005279.1, G027642.1, G027643.1	FCD_00019945-RA_cds	XP_010093955.1, XP_024019798.1
OG0003064	AT2G21660	General processes & autonomous pathway	AT2G21660.1, AT4G39260.1	Aa000426g0258.1, Aa001309g0003.1	Ah000199g0023.1_1, Ah000199g0024.1_1, Ah003348g0008.1_1	G039687.1, G048423.1	FCD_00027605-RA_cds	XP_024030158.1
OG0003126	AT5G48560		AT3G07340.1, AT5G48560.1	Aa000819g0070.1, Aa001978g0067.1	Ah017278g0042.1_1, Ah180406g0020.1_1	G011156.2, G027141.1, G027142.1	FCD_00000209-RA_cds	XP_010100794.1
OG0003179	AT3G10390	FLC regulation through protein complexes	AT3G10390.1	Aa002854g0026.1, Aa003174g0026.1	Ah000916g0004.1_1, Ah003768g0002.1_1	G050772.1, G067578.1	FCD_00028850-RA_cds	XP_010103545.2, XP_024025957.1, XP_024025958.1
OG0003190	AT3G04030	Photoperiod pathway	AT3G04030.1, AT5G18240.1	Aa000606g0012.1, Aa002161g0006.1	Ah002813g0008.1_1, Ah008844g0007.1_1	G045540.1, G067099.1	FCD_00005037-RA_cds	XP_010104961.1, XP_024026934.1
OG0003193	AT3G46640	Temperature pathway	AT3G46640.1, AT5G59570.1	Aa001147g0051.1, Aa001782g0024.1	Ah001015g0024.1_1, Ah180411g0001.1_1	G002871.1, G027239.1	FCD_00002232-RA_cds	XP_010106529.1, XP_024028072.1
OG0003220	AT5G15840	Overview	AT3G02380.1, AT5G15840.1, AT5G15850.1		Ah026307g0003.1_1, Ah077058g0041.1_1	G042008.1, G044503.1, G064650.1	FCD_00017531-RA_cds, FCD_00037244-RA_cds	XP_010100899.1
OG0003235	AT3G12810	FLC regulation through protein complexes	AT3G12810.1	Aa001955g0040.1, Aa004265g0043.1	Ah002213g0004.1_1	G011555.1, G041646.1	FCD_00017193-RA_cds	XP_024025349.1, XP_024025350.1, XP_024025351.1, XP_024025352.1
OG0003267	AT3G54500	Circadian clock overview	AT3G54500.1	Aa006548g0013.1, Aa006548g0014.1	Ah000790g0023.1_1, Ah004963g0001.1_1	G056374.1, G065030.1		XP_010095953.2, XP_024021104.1, XP_024021105.1, XP_024021106.1
OG0003270	AT3G04610	General processes & autonomous pathway	AT3G04610.1	Aa000189g0330.1, Aa001454g0026.1	Ah001519g0003.1_1, Ah180528g0057.1_1	G008826.1, G029617.1	FCD_00000946-RA_cds, FCD_00000955-RA_cds	XP_024025158.1, XP_024025159.1
OG0003307	AT5G63470	Photoperiod pathway	AT3G48590.1, AT5G63470.1	Aa000524g0105.1, Aa000972g0464.1	Ah000916g0044.1_1, Ah179705g0011.1_1	G015213.1, G067626.1	FCD_00014490-RA_cds	XP_024022348.1, XP_024022349.1
OG0003359	AT4G22140	Time-course regulation of photoperiodic pathway	AT4G22140.1	Aa001007g0018.1, Aa001879g0030.1	Ah001882g0013.1_1, Ah010360g0023.1_1	G003036.1, G038503.1, G044275.3	FCD_00031325-RA_cds	XP_010089441.2, XP_024023195.1
OG0003383	AT4G08920	Photoperiod pathway	AT4G08920.1	Aa000433g0050.1, Aa001144g0077.1	Ah002065g0070.1_1, Ah180667g0001.1_1	G032061.1, G040302.1	FCD_00007871-RA_cds, FCD_00010912-RA_cds	XP_010089879.1, XP_024017046.1
OG0003450	AT4G16280	Temperature pathway	AT4G16280.1	Aa001226g0012.1, Aa018837g0001.1, Aa172133g0037.1	Ah178163g0001.1_1	G005064.1, G006862.1, G014168.1, G066007.1	FCD_00025527-RA_cds	XP_024030728.1
OG0003456	AT5G23150	General processes & autonomous pathway	AT5G08230.1, AT5G23150.1	Aa000109g0127.1, Aa001388g0078.1	Ah000947g0013.1_1, Ah180345g0011.1_1	G025745.1, G068316.1	FCD_00006487-RA_cds, FCD_00006488-RA_cds	XP_024019858.1
OG0003554	AT5G13480	Vernalization	AT5G13480.1	Aa006548g0005.1	Ah001676g0003.1_1, Ah006323g0003.1_1	G010863.1, G010864.1, G061547.1	FCD_00035146-RA_cds	XP_024021101.1, XP_024021102.1, XP_024021103.1
OG0003591	AT5G09740	General processes & autonomous pathway	AT5G09740.1, AT5G64610.1	Aa000117g0265.1, Aa000646g0060.1	Ah179981g0003.1_1, Ah180157g0064.1_1	G017407.1, G022573.1	FCD_00022329-RA_cds	XP_010095513.1, XP_024020771.1
OG0003603	AT5G61060	FLC regulation through protein complexes	AT5G61050.1, AT5G61060.1, AT5G61070.1	Aa001440g0008.1, Aa002023g0016.1	Ah001593g0037.1_1, Ah180093g0012.1_1	G010097.1, G020961.1	FCD_00014799-RA_cds	XP_010094454.2
OG0003619	AT5G59560	Circadian clock overview	AT5G59560.1	Aa001454g0003.1	Ah001676g0007.1_1, Ah180016g0004.1_1	G010870.1, G018796.1	FCD_00023761-RA_cds, FCD_00034372-RA_cds, FCD_00037512-RA_cds	XP_010095970.1, XP_024021129.1
OG0003626	AT5G64170	Circadian clock overview	AT5G64170.1	Aa001187g0159.1, Aa001187g0160.1, Aa001308g0004.1	Ah180590g0001.1_1, Ah181012g0001.1_1	G030856.1, G030857.1, G036200.1		XP_024019870.1, XP_024019871.1
OG0003633	AT5G60410	General processes & autonomous pathway	AT5G60410.1	Aa000219g0059.1, Aa003601g0014.1	Ah003669g0002.1_1, Ah008747g0007.1_1	G050141.1, G066904.1	FCD_00001364-RA_cds	XP_024026342.1, XP_024026343.1, XP_024026344.1
OG0003874	AT3G26744	Vernalization	AT1G12860.1, AT3G26744.1	Aa000259g0033.1, Aa000555g0072.1	Ah017278g0103.1_1, Ah180735g0018.1_1	G011252.1, G033186.1	FCD_00021746-RA_cds	XP_010096038.1
OG0003993	AT1G80070	General processes & autonomous pathway	AT1G80070.1, AT4G38780.1	Aa000092g0139.1, Aa000944g0103.1	Ah000009g0043.1_1, Ah179984g0027.1_1	G017519.1, G069279.1	FCD_00003195-RA_cds	XP_010097211.1
OG0004041	AT1G22770	Overview	AT1G22770.1	Aa000202g0020.1, Aa002276g0026.1	Ah002166g0006.1_1, Ah180475g0007.1_1	G028712.1, G041069.1	FCD_00025255-RA_cds, FCD_00037423-RA_cds	XP_024022247.1
OG0004046	AT1G30040	Hormone pathway	AT1G30040.1, AT1G78440.1, AT2G34555.1	Aa003668g0001.1	Ah000546g0019.1_1, Ah179840g0012.1_1	G015871.1, G059041.1	FCD_00020094-RA_cds	XP_010110967.1
OG0004175	AT1G79430	Photoperiod pathway	AT1G79430.1	Aa000379g0017.1, Aa000912g0008.1	Ah004365g0004.1_1, Ah005721g0007.1_1	G053709.1, G059687.1	FCD_00018670-RA_cds	XP_024018818.1, XP_024018819.1
OG0004215	AT1G78580	Aging pathway	AT1G78580.1	Aa000065g0003.1, Aa169592g0003.1	Ah002120g0009.1_1, Ah178113g0003.1_1	G013936.1, G040856.1	FCD_00029274-RA_cds, FCD_00033221-RA_cds	XP_010093449.1
OG0004294	AT1G01040	microRNA biosynthesis	AT1G01040.1	Aa000277g0224.1, Aa001852g0027.1	Ah180378g0007.1_1, Ah180649g0022.1_1	G026391.1, G031706.2	FCD_00012132-RA_cds, FCD_00035356-RA_cds	XP_024028467.1
OG0004329	AT5G44160	Sugar pathway	AT1G03840.1, AT5G44160.1	Aa000158g0230.1	Ah004483g0001.1_1, Ah180426g0022.1_1	G027654.1, G054099.1	FCD_00019931-RA_cds, FCD_00036713-RA_cds	XP_010093965.2
OG0004363	AT1G66350	Hormone pathway	AT1G66350.1	Aa000313g0003.1, Aa002487g0011.1	Ah107929g0007.1_1, Ah180382g0016.1_1	G003755.1, G026483.1	FCD_00010424-RA_cds, FCD_00036366-RA_cds	XP_010109004.2
OG0004434	AT1G79730	FLC regulation through protein complexes	AT1G79730.1	Aa000074g0121.1, Aa000217g0032.1	Ah000748g0114.1_1, Ah180608g0018.1_1	G031168.1, G064234.1	FCD_00005631-RA_cds	XP_024022457.1, XP_024022458.1
OG0004438	AT1G71800	Vernalization	AT1G71800.1	Aa000129g0009.1, Aa000678g0001.1, Aa002276g0002.1	Ah180024g0013.1_1	G019041.1, G041635.1	FCD_00026065-RA_cds	XP_010094887.1, XP_024020348.1
OG0004572	AT2G48160	General processes & autonomous pathway	AT2G48160.1, AT3G63070.1	Aa000504g0034.1, Aa001858g0192.1	Ah000032g0018.1_1, Ah008627g0006.1_1	G048107.1, G066687.1	FCD_00000754-RA_cds	XP_024017382.1
OG0004586	AT2G45430	Time-course regulation of photoperiodic pathway	AT2G45430.1, AT3G60870.1	Aa000180g0200.1, Aa001020g0069.1	Ah011237g0004.1_1, Ah180342g0011.1_1	G004559.1, G025708.1	FCD_00013627-RA_cds	XP_010092850.1
OG0004602	AT2G39810	Photoperiod pathway	AT2G39810.1	Aa000025g0038.1, Aa001157g0107.1	Ah180175g0014.1_1, Ah180943g0105.1_1	G022846.1, G035663.1	FCD_00010058-RA_cds, FCD_00035325-RA_cds	XP_024026855.1
OG0004633	AT2G40080	Temperature pathway	AT2G40080.1	Aa000190g0133.1, Aa001182g0017.1	Ah000104g0031.1_1, Ah000720g0009.1_1	G003224.1, G063373.1	FCD_00015066-RA_cds	XP_010106262.2, XP_024027928.1
OG0004747	AT2G44680	Circadian clock overview	AT2G44680.1, AT3G60250.1	Aa000223g0056.1, Aa004450g0003.1	Ah003856g0001.1_1	G051239.1	FCD_00031879-RA_cds, FCD_00034309-RA_cds	XP_024017001.1, XP_024017002.1
OG0004788	AT4G40060		AT2G22430.1, AT4G40060.1	Aa000545g0009.1, Aa172134g0061.1	Ah180005g0034.1_1, Ah180284g0022.1_1	G018484.2, G024664.1	FCD_00016915-RA_cds	XP_010106292.1
OG0004791	AT2G28550	Temperature pathway	AT2G28550.1	Aa000219g0033.1, Aa004882g0030.1	Ah008747g0033.1_1, Ah180295g0048.1_1	G024842.1, G066946.1	FCD_00002453-RA_cds	XP_024031787.1, XP_024031788.1
OG0004792	AT2G43010	Overview	AT2G43010.1, AT3G59060.1	Aa000158g0065.1	Ah004398g0001.1_1, Ah180621g0016.1_1	G004569.1, G053834.1	FCD_00034923-RA_cds	XP_010093193.2, XP_024019248.1
OG0004914	AT3G01090	Sugar pathway	AT3G01090.1, AT3G29160.1	Aa000334g0103.1, Aa010201g0022.1	Ah001538g0028.1_1, Ah007886g0013.1_1	G009140.1	FCD_00025710-RA_cds	XP_024016886.1, XP_024016887.1
OG0005004	AT3G07650	Photoperiod pathway	AT3G07650.1, AT5G48250.1	Aa001103g0001.1, Aa007006g0003.1	Ah180191g0008.1_1, Ah181054g0005.1_1	G023021.1, G036742.1	FCD_00014149-RA_cds	XP_024028610.1
OG0005253	AT3G20810	Temperature pathway	AT3G20810.1	Aa000189g0107.1, Aa172126g0017.1	Ah000308g0018.1_1, Ah180722g0009.1_1	G032949.1, G047036.1	FCD_00015957-RA_cds	XP_010091990.1, XP_024018510.1
OG0005360	AT4G25420	Hormone pathway	AT4G25420.1, AT5G51810.1	Aa000804g0097.1, Aa001182g0278.1	Ah007320g0004.1_1, Ah177303g0001.1_1	G013004.1, G063726.1	FCD_00004610-RA_cds	XP_010109056.1
OG0005367	AT4G39100	General processes & autonomous pathway	AT4G39100.1	Aa000814g0031.1, Aa001173g0037.1	Ah000004g0002.1_1, Ah180140g0019.1_1	G022090.1, G056545.1	FCD_00032545-RA_cds	XP_024028958.1, XP_024028959.1
OG0005393	AT4G02560	General processes & autonomous pathway	AT4G02560.1	Aa001890g0016.1, Aa002081g0003.1	Ah008110g0017.1_1, Ah179957g0005.1_1	G017245.1, G065520.1, G065521.1	FCD_00006976-RA_cds	XP_024017708.1
OG0005426	AT4G23100	General processes & autonomous pathway	AT4G23100.1	Aa000089g0245.1	Ah180383g0059.1_1	G005298.1, G026573.1	FCD_00005023-RA_cds, FCD_00026456-RA_cds	XP_024031133.1, XP_024031139.1, XP_024031144.1
OG0005429	AT4G21200	Hormone pathway	AT4G21200.1	Aa000468g0015.1	Ah180176g0003.1_1	G022855.1, G061165.1	FCD_00003026-RA_cds, FCD_00036390-RA_cds	XP_010088069.1, XP_024024975.1, XP_024032507.1
OG0005462	AT4G04920	General processes & autonomous pathway	AT4G04920.1	Aa000258g0190.1, Aa000890g0130.1	Ah000159g0084.1_1, Ah179902g0020.1_1	G010354.1, G016661.1	FCD_00012637-RA_cds, FCD_00034148-RA_cds	XP_010100550.1
OG0005482	AT4G29830	FLC regulation through protein complexes	AT4G29830.1	Aa000277g0100.1, Aa001852g0132.1	Ah003597g0004.1_1, Ah180569g0010.1_1	G030374.1, G049763.1	FCD_00010713-RA_cds, FCD_00030310-RA_cds	XP_010090103.1
OG0005505	AT4G10710	FLC regulation through protein complexes	AT4G10670.1, AT4G10710.1	Aa000414g0053.1, Aa002306g0105.1	Ah003979g0056.1_1, Ah180005g0001.1_1	G018431.1, G052156.1	FCD_00027537-RA_cds	XP_010097312.1
OG0005520	AT4G34530	Photoperiod pathway	AT4G34530.1	Aa000426g0264.1, Aa002192g0011.1	Ah009046g0013.1_1, Ah180177g0022.1_1	G067545.1, G067546.1	FCD_00025283-RA_cds	XP_024030235.1, XP_024030241.1
OG0005534	AT4G32980		AT4G32980.1	Aa000002g0213.1, Aa000209g0102.1, Aa000209g0103.1	Ah180000g0112.1_1	G014768.1, G018213.1	FCD_00003702-RA_cds	XP_010097078.2, XP_024021825.1
OG0005617	AT5G24860	Hormone pathway	AT5G10625.1, AT5G24860.1	Aa000117g0221.1, Aa000646g0016.1	Ah180157g0020.1_1, Ah180421g0002.1_1	G022502.1, G027492.1	FCD_00021297-RA_cds	XP_010102853.1
OG0005618	AT5G61380	Circadian clock overview	AT5G61380.1	Aa000176g0008.1, Aa000176g0009.1, Aa002023g0045.1	Ah180052g0006.1_1, Ah180785g0006.1_1	G020151.1, G033828.2	FCD_00014866-RA_cds	XP_010089894.1
OG0005625	AT5G11530	Mains targets of ABC(E)genes	AT5G11530.1	Aa000117g0137.1, Aa001646g0153.1	Ah180288g0019.1_1, Ah180535g0030.1_1	G024708.1, G029751.1	FCD_00021254-RA_cds	XP_024023847.1, XP_024023848.1
OG0005712	AT5G06850	Photoperiod pathway	AT5G06850.1	Aa001955g0001.1, Aa006295g0005.1	Ah176778g0021.1_1, Ah180730g0015.1_1	G012343.1, G033139.1	FCD_00034954-RA_cds	XP_010111400.1, XP_024031126.1
OG0005719	AT5G12840	Photoperiod pathway	AT5G12840.1	Aa000189g0155.1	Ah180514g0025.1_1	G029241.1, G064802.1	FCD_00025422-RA_cds	XP_010102352.1, XP_024025217.1, XP_024025218.1, XP_024025219.1
OG0005780	AT5G51820	Sugar pathway	AT5G51820.1	Aa000804g0098.1, Aa001182g0279.1	Ah007320g0005.1_1, Ah007822g0013.1_1	G063727.1, G064840.1	FCD_00004607-RA_cds	XP_024031526.1, XP_024031527.1
OG0005820	AT5G61150	FLC regulation through protein complexes	AT5G61150.1	Aa000176g0037.1, Aa002023g0020.1	Ah001593g0041.1_1, Ah005442g0029.1_1	G010104.1, G058928.1	FCD_00014808-RA_cds	XP_010105829.1, XP_024027616.1
OG0005839	AT5G03840	Specification of flower mersitems	AT5G03840.1	Aa000114g0117.1, Aa172119g0121.1	Ah004059g0005.1_1, Ah005561g0007.1_1	G052581.1, G059144.1	FCD_00007543-RA_cds	XP_010101582.2, XP_024024797.1
OG0005875	AT5G23730	Photoperiod pathway	AT5G23730.1	Aa001182g0329.1, Aa001923g0051.1	Ah014244g0002.1_1, Ah179919g0001.1_1	G008166.1, G016884.1	FCD_00004502-RA_cds	XP_010107434.1, XP_024028675.1
OG0006098	AT1G77300	Time-course regulation of photoperiodic pathway	AT1G77300.1	Aa000002g0057.1, Aa000209g0246.1	Ah000864g0040.1_1, Ah180039g0017.1_1	G019470.1, G066801.1	FCD_00010266-RA_cds	XP_024019152.1
OG0006099	AT1G15550	Hormone pathway	AT1G15550.1, AT1G80340.1	Aa000074g0033.1, Aa000092g0077.1	Ah180154g0073.1_1	G022451.1, G064096.1	FCD_00003316-RA_cds	XP_010110310.1
OG0006124	AT1G51140	Photoperiod pathway	AT1G51140.1	Aa000189g0116.1, Aa172126g0025.1	Ah000308g0030.1_1, Ah180722g0002.1_1	G032937.2, G047051.1	FCD_00015968-RA_cds	XP_010091980.1
OG0006174	AT1G47990	Hormone pathway	AT1G47990.1	Aa001948g0005.1	Ah002653g0022.1_1, Ah178076g0014.1_1	G013859.1, G044617.1	FCD_00025550-RA_cds, FCD_00029420-RA_cds	XP_010102906.1
OG0006211	AT1G12910	Circadian clock overview	AT1G12910.1, AT3G26640.1	Aa000555g0080.1, Aa171834g0011.1	Ah017278g0092.1_1, Ah180199g0011.1_1	G011230.1, G023170.1		XP_010090944.1
OG0006224	AT1G65480	Overview	AT1G65480.1, AT4G20370.1			G026845.1	FCD_00022854-RA_cds, FCD_00026667-RA_cds, FCD_00026669-RA_cds, FCD_00035530-RA_cds	XP_010108628.1, XP_010109942.1
OG0006233	AT1G26260		AT1G26260.1, AT1G68920.1	Aa000972g0096.1, Aa002097g0024.1	Ah001845g0007.1_1, Ah176068g0015.1_1	G011973.1, G037943.1		XP_010091656.1
OG0006411	AT5G37260		AT1G18330.1, AT3G10113.1, AT5G37260.1	Aa000437g0001.1		G009600.1	FCD_00031119-RA_cds	XP_010099675.2, XP_024023521.1, XP_024023522.1
OG0006592	AT1G19330	Time-course regulation of photoperiodic pathway	AT1G19330.1	Aa000002g0491.1, Aa000115g0319.1	Ah000362g0006.1_1, Ah180002g0003.1_1	G018356.1, G050049.1	FCD_00008829-RA_cds	XP_010106036.1
OG0006856	AT1G68050	Circadian clock overview	AT1G68050.1	Aa002139g0005.1, Aa007145g0001.1	Ah000325g0002.1_1, Ah001547g0023.1_1	G009432.1, G048034.1	FCD_00025790-RA_cds	XP_010088186.1
OG0006924	AT2G42280	Photoperiod pathway	AT2G42280.1	Aa000184g0061.1, Aa002778g0053.1	Ah007242g0012.1_1, Ah011709g0001.1_1	G004958.1, G063529.1	FCD_00022844-RA_cds	XP_010111430.1
OG0006932	AT2G21070	Circadian clock overview	AT2G21070.1	Aa000509g0136.1	Ah003763g0029.1_1	G050758.1	FCD_00000811-RA_cds, FCD_00019754-RA_cds	XP_024017386.1, XP_024017387.1, XP_024017388.1
OG0006939	AT2G23740	General processes & autonomous pathway	AT2G23740.1	Aa000977g0041.1, Aa001026g0205.1	Ah002334g0004.1_1	G017102.1, G042737.1	FCD_00023684-RA_cds	XP_024022351.1, XP_024022352.1
OG0006951	AT2G42200	Overview	AT2G42200.1, AT3G57920.1	Aa001955g0050.1, Aa004265g0034.1	Ah174471g0015.1_1	G011536.1, G041663.1	FCD_00017209-RA_cds	XP_010102560.1
OG0006968	AT2G44950	FLC regulation through protein complexes	AT2G44950.1	Aa002093g0010.1, Aa010269g0086.1	Ah005925g0025.1_1, Ah179843g0040.1_1	G015978.1, G060277.1	FCD_00012019-RA_cds	XP_024032871.1
OG0007094	AT2G45650	General processes & autonomous pathway	AT2G45650.1, AT3G61120.1	Aa002076g0030.1, Aa003100g0011.1	Ah002387g0003.1_1, Ah004490g0005.1_1	G043105.1, G054119.1		XP_010106750.1
OG0007146	AT2G03500	Temperature pathway	AT2G03500.1	Aa000180g0154.1, Aa001020g0019.1	Ah001345g0014.1_1, Ah178061g0002.1_1	G007193.1, G013790.1	FCD_00019903-RA_cds	XP_010098958.1
OG0007213	AT2G30120	FLC regulation through protein complexes	AT2G30120.1	Aa000467g0032.1, Aa003905g0019.1	Ah000104g0045.1_1, Ah000840g0033.1_1	G003243.1, G066282.1	FCD_00001955-RA_cds	XP_010099467.1
OG0007229	AT2G44150	Vernalization	AT2G44150.1, AT3G59960.1	Aa001241g0004.1	Ah048720g0006.1_1	G056103.1, G068802.2		XP_024018984.1, XP_024018985.1, XP_024022069.1
OG0007237	AT2G23380	Time-course regulation of photoperiodic pathway	AT2G23380.1	Aa000120g0200.1, Aa001026g0106.1	Ah000482g0043.1_1	G020131.3, G056027.1	FCD_00006314-RA_cds	XP_024030118.1, XP_024031431.1
OG0007309	AT2G33835	FLC regulation through protein complexes	AT2G33835.1	Aa000258g0142.1, Aa000890g0177.1	Ah178266g0023.1_1, Ah180273g0011.1_1	G014580.1, G024222.1	FCD_00012542-RA_cds	XP_024031052.1
OG0007330	AT4G28190	Mains targets of ABC(E)genes	AT2G20825.1, AT4G28190.1	Aa001685g0015.1, Aa001686g0105.1	Ah000940g0011.1_1, Ah181050g0001.1_1	G036701.1, G068127.1		XP_010095817.1
OG0007400	AT2G46020	General processes & autonomous pathway	AT2G46020.1	Aa001694g0017.1, Aa002708g0033.1	Ah000097g0015.1_1, Ah000945g0003.1_1	G068189.1, G068779.1	FCD_00022898-RA_cds	XP_010087939.1
OG0007415	AT2G06210	FLC regulation through protein complexes	AT2G06210.1	Aa000277g0123.1, Aa001852g0111.1	Ah003942g0134.1_1, Ah180569g0031.1_1	G030405.1, G051941.1	FCD_00010672-RA_cds	XP_024017185.1
OG0007461	AT3G49660	FLC regulation through protein complexes	AT3G49660.1	Aa000800g0014.1, Aa001609g0003.1	Ah000455g0061.1_1, Ah180721g0002.1_1	G032890.1, G054498.1	FCD_00006060-RA_cds	XP_010105105.1
OG0007498	AT3G63010	Hormone pathway	AT3G63010.1	Aa001890g0061.1, Aa002081g0047.1	Ah000055g0012.1_1, Ah179957g0048.1_1	G040898.1, G059277.1	FCD_00007041-RA_cds	XP_010112697.1
OG0007543	AT5G14170	General processes & autonomous pathway	AT3G01890.1, AT5G14170.1	Aa000259g0103.1	Ah010068g0012.1_1	G043522.1	FCD_00018400-RA_cds	XP_024031799.1, XP_024031800.1, XP_024031801.1
OG0007631	AT3G46510	General processes & autonomous pathway	AT3G46510.1	Aa003136g0032.1, Aa003638g0005.1	Ah000072g0018.1_1, Ah000539g0013.1_1	G058664.1, G063688.1	FCD_00002316-RA_cds	XP_010106453.1
OG0007646	AT3G43920	General processes & autonomous pathway	AT3G43920.1	Aa000002g0133.1	Ah180000g0029.1_1	G018085.1, G019565.1	FCD_00003835-RA_cds, FCD_00023490-RA_cds, FCD_00023511-RA_cds	XP_024022687.1
OG0007776	AT3G28730	FLC regulation through protein complexes	AT3G28730.1	Aa000259g0350.1, Aa000334g0211.1	Ah000038g0034.1_1, Ah004086g0019.1_1	G051569.1, G052673.1	FCD_00001583-RA_cds	XP_024031637.1
OG0007896	AT3G20740	Mains targets of ABC(E)genes	AT3G20740.1	Aa002033g0007.1, Aa005433g0014.1	Ah180471g0007.1_1, Ah180780g0006.1_1	G028654.1, G033693.1	FCD_00015493-RA_cds	XP_024019003.1
OG0007932	AT3G24440	FLC regulation through protein complexes	AT3G24440.1	Aa000080g0087.1, Aa000558g0096.1	Ah001849g0001.1_1, Ah001906g0047.1_1	G038009.2, G038930.1	FCD_00019865-RA_cds	XP_024029764.1
OG0007961	AT3G57300	General processes & autonomous pathway	AT3G57300.1	Aa000090g0033.1, Aa003170g0014.1	Ah001869g0020.1_1, Ah180077g0008.1_1	G020775.1, G038344.1	FCD_00018499-RA_cds	XP_024017285.1
OG0008089	AT4G02780	Hormone pathway	AT4G02780.1	Aa001858g0224.1	Ah010704g0041.1_1	G003605.1, G015407.1, G019136.1, G033804.1	FCD_00000700-RA_cds	XP_024017389.1
OG0008102	AT4G10180	General processes & autonomous pathway	AT4G10180.1	Aa009837g0026.1	Ah004366g0009.1_1	G037718.1, G053724.1	FCD_00011666-RA_cds	XP_010088718.2, XP_024028843.1, XP_024028849.1
OG0008208	AT4G36920	Aging pathway	AT4G36920.1	Aa000120g0191.1, Aa001026g0101.1	Ah000482g0035.1_1, Ah180050g0086.1_1	G020117.1, G056014.1	FCD_00006296-RA_cds	XP_010109804.1
OG0008258	AT4G00450	General processes & autonomous pathway	AT4G00450.1	Aa001694g0002.1, Aa002708g0020.1	Ah000572g0003.1_1, Ah180279g0001.1_1	G024505.1, G059756.1	FCD_00022876-RA_cds	XP_010105926.1
OG0008300	AT4G15880	General processes & autonomous pathway	AT4G15880.1	Aa000359g0018.1, Aa001937g0043.1	Ah005912g0014.1_1, Ah180715g0041.1_1	G032823.1, G060185.1	FCD_00023370-RA_cds	XP_024022610.1
OG0008333	AT4G03090	Vernalization	AT4G03090.1	Aa001890g0056.1, Aa002081g0042.1	Ah000055g0004.1_1, Ah179957g0041.1_1	G017302.1, G059268.1	FCD_00007033-RA_cds	XP_024032046.1
OG0008365	AT4G24620	Sugar pathway	AT4G24620.1	Aa000117g0043.1, Aa001646g0045.1	Ah005305g0013.1_1, Ah181029g0032.1_1	G036412.1, G058175.1	FCD_00009137-RA_cds	XP_024028805.1
OG0008463	AT5G61850	Overview	AT5G61850.1	Aa000371g0060.1, Aa025209g0047.1	Ah181092g0012.1_1	G026929.1, G026930.1, G037306.1	FCD_00016116-RA_cds	XP_010105604.1
OG0008536	AT5G61920	FLC regulation through protein complexes	AT5G61920.1	Aa000250g0014.1, Aa000312g0036.1	Ah178276g0006.1_1, Ah180571g0020.1_1	G014629.1, G030444.1	FCD_00023737-RA_cds	XP_024025709.1
OG0008572	AT5G04240	Time-course regulation of photoperiodic pathway	AT5G04240.1	Aa002854g0004.1, Aa172132g0013.1	Ah180330g0003.1_1, Ah180639g0006.1_1	G025516.1, G031619.1	FCD_00026965-RA_cds	XP_024031706.1
OG0008611	AT5G40490	Vernalization	AT5G40490.1	Aa000572g0023.1	Ah000352g0048.1_1, Ah177044g0013.1_1	G012693.1, G049447.1	FCD_00001796-RA_cds, FCD_00016398-RA_cds	XP_024032388.1
OG0008633	AT5G17690	Time-course regulation of photoperiodic pathway	AT5G17690.1	Aa000202g0028.1, Aa172023g0011.1	Ah002172g0044.1_1, Ah028526g0002.1_1	G041220.1, G045723.1	FCD_00025240-RA_cds	XP_010097669.1
OG0008722	AT5G46210	Time-course regulation of photoperiodic pathway	AT5G46210.1	Aa000334g0046.1, Aa003668g0006.1	Ah000546g0024.1_1, Ah179840g0004.1_1	G015857.1, G059049.1	FCD_00020088-RA_cds	XP_024030922.1
OG0008775	AT5G57660	Photoperiod pathway	AT5G57660.1	Aa000250g0032.1, Aa001226g0062.1	Ah005761g0002.1_1, Ah180165g0001.1_1	G022661.1, G059905.1	FCD_00023656-RA_cds	XP_010102982.1
OG0008797	AT5G63110	FLC regulation through protein complexes	AT5G63110.1	Aa000279g0026.1, Aa002005g0060.1	Ah178239g0014.1_1, Ah180267g0033.1_1	G014446.1, G024086.1	FCD_00018090-RA_cds	XP_010102492.1
OG0008812	AT5G24470	Circadian clock overview	AT5G24470.1	Aa000308g0043.1, Aa000799g0063.1	Ah004608g0075.1_1, Ah180986g0003.1_1	G035987.1, G054799.1	FCD_00009690-RA_cds	XP_010099422.1
OG0008946	AT5G37055	FLC regulation through protein complexes	AT5G37055.1	Aa000467g0017.1, Aa003905g0005.1	Ah173605g0010.1_1, Ah178363g0017.1_1	G011375.1, G014866.1	FCD_00001931-RA_cds	XP_010099448.1
OG0009531	AT1G09570	Photoperiod pathway	AT1G09570.1	Aa000414g0025.1, Aa002306g0075.1	Ah002813g0026.1_1	G003944.1, G045568.1	FCD_00015010-RA_cds	XP_010094926.1
OG0009628	AT1G61040	FLC regulation through protein complexes	AT1G61040.1	Aa000258g0196.1, Aa000890g0124.1	Ah179902g0012.1_1	G010364.1, G016649.1	FCD_00012651-RA_cds	XP_010100559.1
OG0009801	AT1G08260	General processes & autonomous pathway	AT1G08260.1, AT2G27120.1	Aa000054g0029.1	Ah020182g0007.1_1	G039777.1	FCD_00031210-RA_cds, FCD_00034765-RA_cds	XP_024019252.1
OG0009805	AT1G79460	Hormone pathway	AT1G79460.1	Aa000379g0020.1	Ah002853g0002.1_1, Ah180741g0004.1_1	G045728.1	FCD_00018675-RA_cds	XP_024018800.1, XP_024018801.1
OG0009839	AT1G72390	Photoperiod pathway	AT1G72390.1	Aa001252g0119.1, Aa001519g0033.1		G006173.1, G041494.1	FCD_00005711-RA_cds	XP_010111980.1, XP_010111982.1
OG0009875	AT1G02400	Hormone pathway	AT1G02400.1	Aa000661g0013.1, Aa010174g0059.1	Ah007025g0002.1_1, Ah181059g0052.1_1	G036894.1, G062830.1		XP_010094408.2
OG0009897	AT1G55325	General processes & autonomous pathway	AT1G55325.1	Aa001590g0004.1	Ah066238g0006.1_1	G054213.1, G062014.1, G062015.1	FCD_00024337-RA_cds	XP_024032019.1
OG0010200	AT2G22370	General processes & autonomous pathway	AT2G22370.1	Aa000002g0470.1, Aa000115g0339.1	Ah000361g0043.1_1	G021844.1, G049943.1	FCD_00008790-RA_cds	XP_024027759.1
OG0010205	AT4G38960	Photoperiod pathway	AT2G21320.1, AT4G38960.1		Ah000112g0010.1_1	G004609.1, G047905.2	FCD_00008621-RA_cds	XP_010113384.2, XP_024032860.1
OG0010251	AT2G43410	Vernalization	AT2G43410.1	Aa000447g0033.1	Ah001549g0016.1_1	G009504.1, G018501.1	FCD_00034828-RA_cds	XP_010086699.1, XP_024025466.1
OG0010529	AT3G33520	Temperature pathway	AT3G33520.1	Aa004969g0012.1	Ah180849g0033.1_1	G033298.1, G034555.1	FCD_00023457-RA_cds, FCD_00032612-RA_cds	XP_024026082.1
OG0010594	AT3G48430	Time-course regulation of photoperiodic pathway	AT3G48430.1	Aa000972g0404.1, Aa003883g0060.1	Ah180359g0010.1_1	G020606.1, G025954.1	FCD_00013085-RA_cds	XP_010101942.1
OG0010793	AT4G37280	Time-course regulation of photoperiodic pathway	AT4G37280.1	Aa000120g0163.1	Ah000482g0011.1_1, Ah180050g0055.1_1	G020079.1, G055979.1	FCD_00006242-RA_cds	XP_024020650.1
OG0010807	AT4G26440	Vernalization	AT4G26440.1, AT5G56270.1	Aa002120g0007.1	Ah180510g0002.1_1	G025844.1, G029139.1	FCD_00033604-RA_cds	XP_010092241.1
OG0011063	AT5G58230	Photoperiod pathway	AT5G58230.1	Aa001677g0006.1, Aa171988g0021.1	Ah000455g0092.1_1, Ah178221g0001.1_1	G014356.1	FCD_00016864-RA_cds	XP_010105610.2
OG0011245	AT5G13790	Time-course regulation of photoperiodic pathway	AT5G13790.1	Aa000269g0121.1	Ah002843g0047.1_1	G017931.1, G017932.1, G045675.1	FCD_00012347-RA_cds	XP_024025821.1
OG0011343	AT5G63960	General processes & autonomous pathway	AT5G63960.1	Aa172097g0003.1	Ah000472g0008.1_1	G055662.2	FCD_00017410-RA_cds	XP_024017731.1, XP_024029192.1, XP_024032774.1
OG0011382	AT5G48300	Sugar pathway	AT5G48300.1	Aa000963g0006.1, Aa172068g0007.1	Ah006175g0002.1_1, Ah173664g0005.1_1	G011466.1	FCD_00014133-RA_cds	XP_010107371.1
OG0012229	AT1G02740	Time-course regulation of photoperiodic pathway	AT1G02740.1	Aa000115g0471.1	Ah179901g0006.1_1	G016582.1	FCD_00003950-RA_cds	XP_024024845.1, XP_024024846.1
OG0012289	AT1G55250	FLC regulation through protein complexes	AT1G55250.1	Aa000128g0037.1	Ah178156g0001.1_1	G014083.1	FCD_00031761-RA_cds, FCD_00034785-RA_cds	XP_010088979.2
OG0012585	AT2G18790	Photoperiod pathway	AT2G18790.1, AT4G16250.1	Aa002694g0044.1	Ah077058g0007.1_1	G064594.1	FCD_00013478-RA_cds	XP_024030240.1
OG0012609	AT2G47700	Photoperiod pathway	AT2G47700.1	Aa000426g0007.1	Ah009993g0011.1_1	G069209.1	FCD_00006912-RA_cds	XP_024030897.1, XP_024030898.1
OG0012740	AT3G49600	Vernalization	AT3G49600.1	Aa000117g0230.1, Aa000646g0027.1	Ah180421g0014.1_1	G027512.1	FCD_00021317-RA_cds	XP_010108151.2
OG0012771	AT3G45880	General processes & autonomous pathway	AT3G45880.1	Aa002361g0006.1	Ah180937g0001.1_1	G035479.1	FCD_00022907-RA_cds, FCD_00037827-RA_cds	XP_010111296.2
OG0012808	AT3G44680	General processes & autonomous pathway	AT3G44680.1	Aa000258g0066.1	Ah005267g0020.1_1	G057825.1	FCD_00029296-RA_cds	XP_010093211.1, XP_024019260.1
OG0012832	AT3G13682	Time-course regulation of photoperiodic pathway	AT3G13682.1	Aa172106g0017.1	Ah001249g0016.1_1	G005949.1, G005958.1	FCD_00031632-RA_cds	XP_024032980.1
OG0012907	AT3G01460	General processes & autonomous pathway	AT3G01460.1	Aa000259g0274.1	Ah000497g0024.1_1, Ah179820g0002.1_1	G056448.1	FCD_00001708-RA_cds	XP_024031406.1
OG0012965	AT5G49020	General processes & autonomous pathway	AT3G06930.1, AT5G49020.1			G032832.1, G060195.1	FCD_00012693-RA_cds	XP_010098279.1, XP_024022623.1
OG0013066	AT4G18130	Photoperiod pathway	AT4G18130.1	Aa001423g0125.1, Aa002683g0035.1	Ah000539g0001.1_1	G058645.1	FCD_00027177-RA_cds	XP_010100997.1
OG0013227	AT5G51230	Mains targets of ABC(E)genes	AT5G51230.1	Aa000258g0024.1	Ah003157g0008.1_1	G047239.1, G047366.1		XP_024018941.1, XP_024018942.1
OG0013235	AT5G62040	General processes & autonomous pathway	AT5G62040.1	Aa001182g0319.1	Ah180363g0042.1_1	G026083.1, G035048.1	FCD_00004520-RA_cds	XP_010107418.1
OG0013400	AT5G45600	FLC regulation through protein complexes	AT5G45600.1	Aa000913g0057.1	Ah001611g0002.1_1	G033611.1	FCD_00008599-RA_cds, FCD_00018962-RA_cds	XP_010113366.1
OG0014264	AT1G04870	General processes & autonomous pathway	AT1G04870.1	Aa001019g0074.1	Ah081283g0030.1_1	G065662.1	FCD_00020279-RA_cds	XP_024023081.1
OG0014282	AT1G51450	FLC regulation through protein complexes	AT1G51450.1	Aa172126g0072.1	Ah180514g0014.1_1	G029222.1	FCD_00020746-RA_cds	XP_010102370.1
OG0014389	AT1G17760	Vernalization	AT1G17760.1	Aa003172g0015.1		G030898.1, G030899.1	FCD_00033539-RA_cds	XP_024020703.1
OG0014430	AT1G62830	Time-course regulation of photoperiodic pathway	AT1G62830.1	Aa001964g0090.1	Ah006053g0025.1_1	G060814.1	FCD_00004094-RA_cds	XP_010101307.2
OG0014555	AT2G32950	Photoperiod pathway	AT2G32950.1	Aa001879g0013.1	Ah006565g0016.1_1	G061868.1	FCD_00037277-RA_cds	XP_010097907.1
OG0014558	AT2G46340	Photoperiod pathway	AT2G46340.1	Aa000180g0241.1	Ah180851g0014.1_1	G034587.1	FCD_00034961-RA_cds	XP_010095715.2
OG0014985	AT4G31120	General processes & autonomous pathway	AT4G31120.1		Ah180157g0035.1_1, Ah180421g0009.1_1	G022531.1	FCD_00021324-RA_cds	XP_024020772.1
OG0014988	AT4G00830	FLC regulation through protein complexes	AT4G00830.1		Ah180090g0004.1_1	G018251.1, G020898.2	FCD_00021961-RA_cds	XP_024024134.1
OG0015002	AT4G16845	FLC regulation through protein complexes	AT4G16845.1	Aa001157g0081.1		G019250.1	FCD_00010128-RA_cds, FCD_00031650-RA_cds	XP_024026871.1
OG0015076	AT5G35910	General processes & autonomous pathway	AT5G35910.1	Aa000787g0011.1	Ah006505g0002.1_1	G061742.1	FCD_00032083-RA_cds	XP_024031414.1
OG0015099	AT5G48890	Photoperiod pathway	AT5G48890.1	Aa000504g0275.1		G018815.1	FCD_00000345-RA_cds, FCD_00037220-RA_cds	XP_010109688.1
OG0016171	AT2G27550	Photoperiod pathway	AT2G27550.1		Ah005267g0003.1_1	G057793.1	FCD_00022155-RA_cds	XP_010089842.1
OG0016324	AT4G11880	Specification of flower mersitems	AT4G11880.1	Aa000260g0030.1		G023795.1		XP_024029068.1, XP_024029069.1
